# Supplementary material for: Hierarchical porous carbon frameworks derived from Juncus effusus biomass with robust electromagnetic wave absorption properties
Source: Royal Society of Chemistry journal article supplement (doi:10.1039/d4tc00223g), 2024-01-01
Supplement: d4tc00223g1.pdf [file d4tc00223g1.pdf]

## Hierarchical porous carbon frameworks derived from *Juncus effusus* biomass with robust electromagnetic wave absorption property

Yunshan Mao<sup>1</sup>, Kaiyu Liu<sup>1</sup>, Yuhao Sheng<sup>1</sup>, Jian Liu<sup>1</sup>, Shaohai Fu<sup>1</sup>, Chunxia Tang<sup>1\*</sup>

<sup>1</sup> College of Textile Science & Engineering, Jiangnan University, 1800 Lihu Avenue, Wuxi, Jiangsu 214122, China

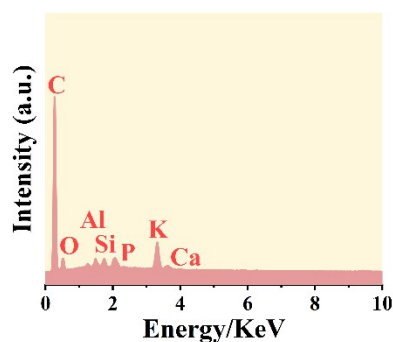

Figure S1. The elements distribution of natural JE.

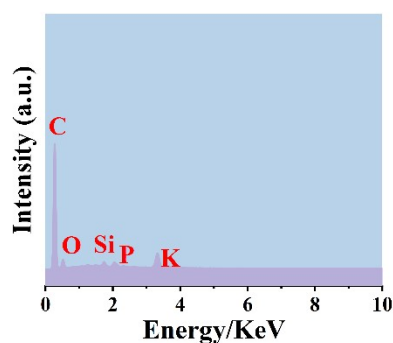

Figure S2. The elements distribution of JE after carbonization.

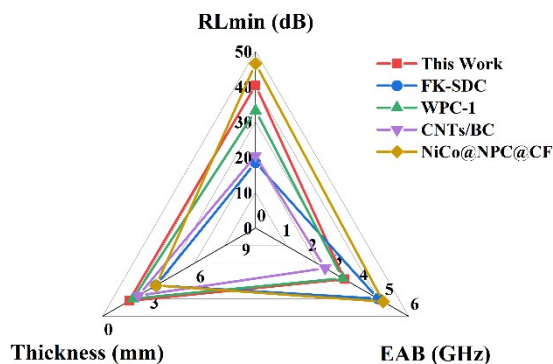

Figure S3. Comprehensive comparison of the EMA performance in view of the RL<sub>min</sub>, Thickness and EAB<sub>max</sub> with reported biomass derived materials.

## References

1. Y. Zeng, F. Mao, Y. Li, W. Zhou and L. Long, *Diamond Relat. Mater.*, 2022, **127**, 109136.
2. H. D. Jin, H. M. Wen, Q. Hong, J. Lin, J. Li and J. Hu, *Journal of Materials Chemistry C*, 2022, **10**, 8310-8320.
3. J. Yue, J. Yu, S. Jiang and Y. Chen, *Diamond Relat. Mater.*, 2022, **126**, 109054.
4. H. Sun, Y. Yang, J. Chen, H. Ge and J. Sun, *Colloids and Surfaces A: Physicochemical and Engineering Aspects*, 2022, **644**, 128826.
